# Supplementary material for: Shigella flexneri disruption of host cell-cell tension promotes intercellular spread
Source: bioRxiv or medRxiv preprint supplement (doi:10.1101/790147), 2019-10-02
Supplement: Supplementary file [file media-1.pdf]

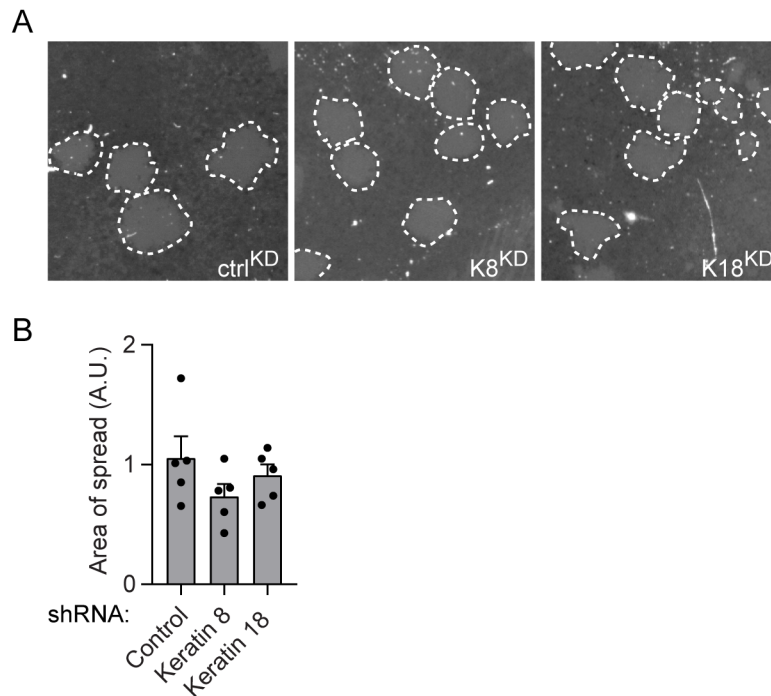

**Figure S1. Intermediate filaments keratin 8 and 18 are dispensable for intercellular spread of *S. flexneri*. (Related to Figure 1).**

Plaque formation by wild-type *S. flexneri* in monolayers of Caco-2 cells stably expressing keratin 8 shRNA, keratin 18 shRNA, or non-targeting shRNA. (A)

Representative images of plaques. (B) Plaque size (area of spread) from experiments represented in panel A, mean  $\pm$  SEM. a.u., arbitrary units. Dots represent independent experiments.

A

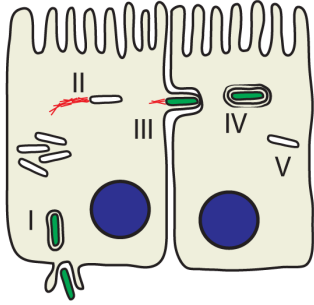

B

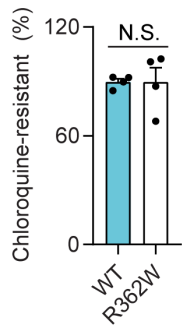

C

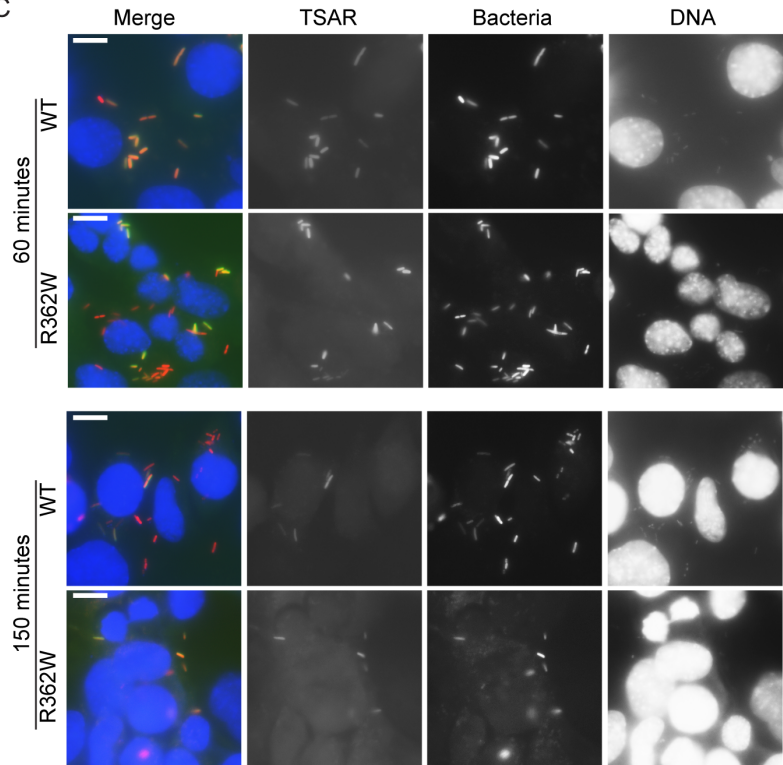

D

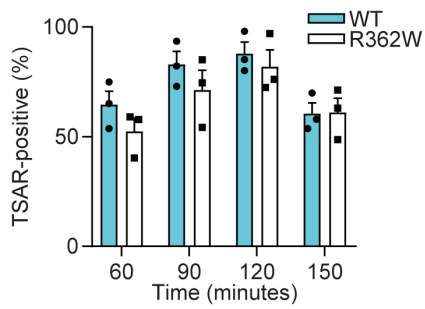

E

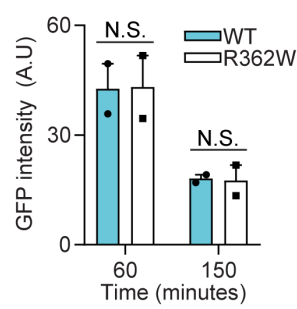

F

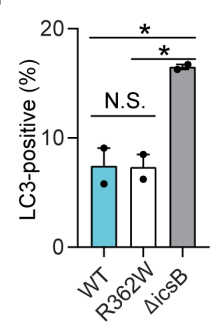

G

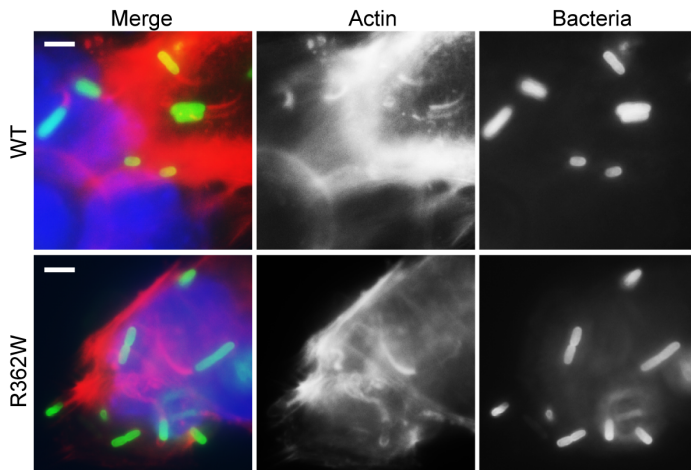

H

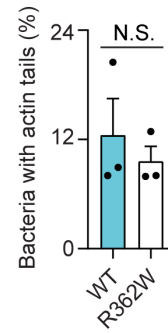

I

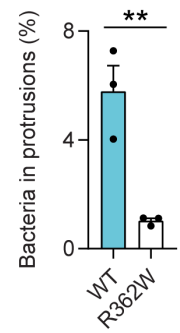

**Figure S2. Vacuolar escape, regulation of the T3SS, autophagic escape, and actin tail formation of *S. flexneri* producing IpaC R362W are similar to that of *S. flexneri* producing wild-type IpaC. (Related to Figure 2).**

Infections of cells with *S. flexneri*  $\Delta$ *ipaC* producing wild-type IpaC or IpaC R362W. (A)

Schematic of *S. flexneri* intracellular lifestyle. (I) After invasion, the *S. flexneri* T3SS ruptures the uptake vacuole, releasing bacteria into the cytosol. (II) In the cytosol, *S. flexneri* utilizes host actin machinery to propel itself to the periphery. (III) At the periphery, motile bacteria form plasma membrane protrusions. (IV) The membranous protrusion is engulfed into a double membrane vacuole in an adjacent cell. (V) The bacteria then rupture the secondary vacuole, thereby escaping into the cytosol, wherein the process is repeated. Type 3 secretion is active during invasion and during spread (stages I, III, IV). Green bacteria, active type 3 secretion. (B) Percent of bacteria that escape the vacuole of Vim<sup>+/+</sup> MEFs, determined by chloroquine resistance.

Intravacuolar bacteria are killed by the high vacuolar concentration of chloroquine, whereas bacteria that escape the vacuole into the cytosol survive. Mean  $\pm$  SEM. (C) Vim<sup>+/+</sup> MEFs infected for 60 or 150 minutes with bacteria containing TSAR, a fluorescent reporter of T3SS activity. Red, *S. flexneri*; green, *S. flexneri* with active T3SS; blue, DNA. Representative images. (D) Percent of *S. flexneri* with active T3SS from experiments represented in panel C and including additional time points at 90 and 120 minutes, mean  $\pm$  SEM. (E) Intensity of the GFP signal from *S. flexneri* with active T3SS from panel C, mean  $\pm$  SEM. (F) Percent of designated *S. flexneri* strains associated with GFP-LC3 during infection of GFP-LC3 HeLa cells. Positive control, *S. flexneri*  $\Delta$ *icsB*. Mean  $\pm$  SEM. (G) Actin tail and protrusion formation in Vim<sup>+/+</sup> MEFs

infected with designated *S. flexneri* strains for 180 minutes. Red, phalloidin; green, *S. flexneri*; blue, DAPI. Representative images. (H) Percentage of bacteria with unipolar actin (tails) from experiments represented in panel G, mean  $\pm$  SEM. (I) Percentage of bacteria in protrusions from panel G, mean  $\pm$  SEM. Dots represent independent experiments. Scale bars, 10  $\mu$ M (C), 5  $\mu$ M (G). N.S., not-significant; \*,  $p < 0.05$ ; \*\*,  $p < 0.01$ .

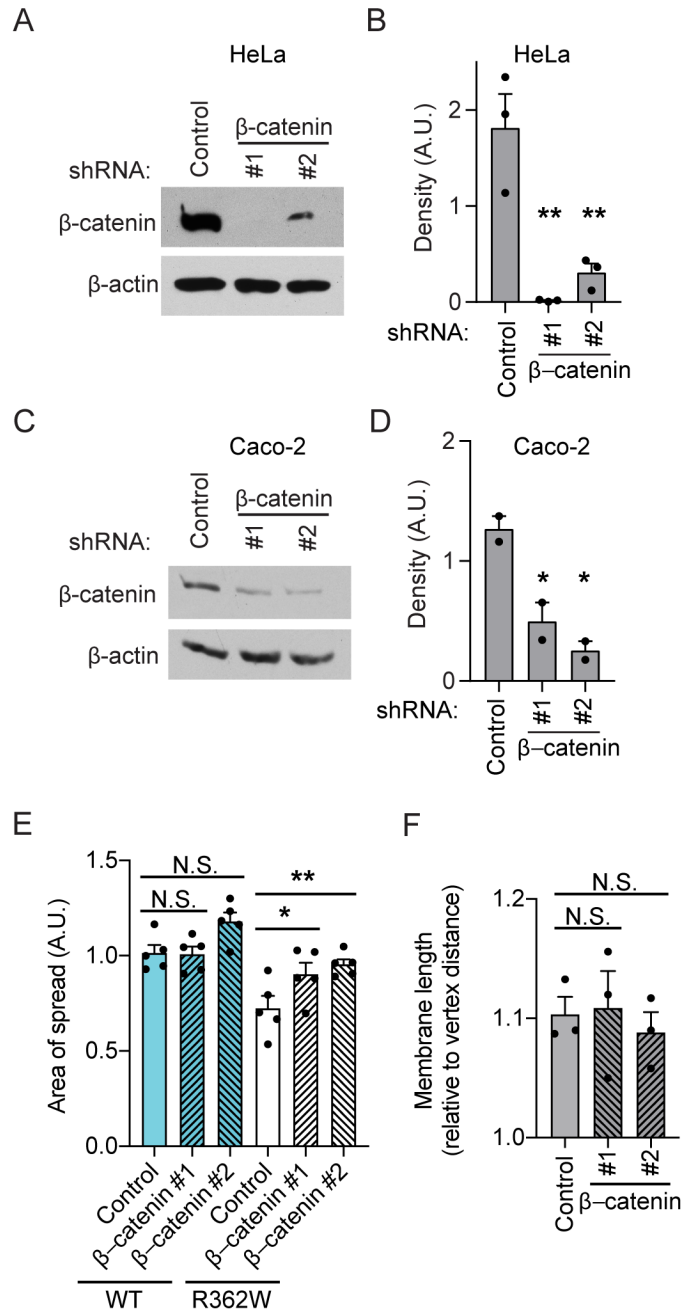

**Figure S3.  $\beta$ -catenin in intercellular spread of *S. flexneri*. (Related to Figure 4).**

(A)  $\beta$ -catenin levels in cell lysates from HeLa cells stably transfected with control or  $\beta$ -catenin targeting shRNAs.  $\beta$ -actin, loading control. Representative western blots. (B)

Densitometric analysis of  $\beta$ -catenin depletion in HeLa cells from experiments

represented in panel A. (C)  $\beta$ -catenin levels in cell lysates from Caco-2 cells stably transfected with control or  $\beta$ -catenin targeting shRNAs.  $\beta$ -actin, loading control. Representative western blots. (D) Densitometric analysis of  $\beta$ -catenin depletion in Caco-2 cells from experiments represented in panel C. (E) Plaque size (area of spread) of Caco-2 cells depleted of  $\beta$ -catenin and infected with *S. flexneri*  $\Delta$ *ipaC* producing wild-type IpaC or IpaC R362W. (F) Quantification of membrane length for Caco-2 cells stably transfected with control or  $\beta$ -catenin targeting shRNAs. Mean  $\pm$  SEM. Dots represent independent experiments. a.u., arbitrary units. \*  $p < 0.05$ ; \*\*  $p < 0.01$ ; \*\*\*  $p < 0.001$ .

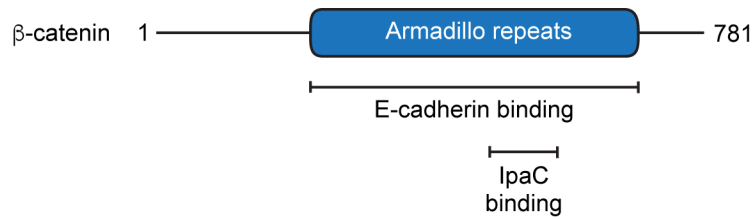

**Figure S4. IpaC binding site on  $\beta$ -catenin overlaps with the E-cadherin binding pocket. (Related to Figures 1-4).**

Region of  $\beta$ -catenin to which E-cadherin and IpaC bind. E-cadherin binds throughout the armadillo repeats (Huber and Weis, 2001). IpaC interaction with  $\beta$ -catenin occurs within the armadillo repeat region of  $\beta$ -catenin and requires the ninth armadillo repeat (Shaikh et al., 2003).
